# Supplementary material
Source: PubMed Central journal article supplement (PMC11028489)
Supplement: 262_2015_1688_MOESM1_ESM.pdf [file 262_2015_1688_MOESM1_ESM.pdf]

| #                                                  | Required                            | If available                        | Optional                            | MIANKA & MIATA Sub-Modules                                                               |
|----------------------------------------------------|-------------------------------------|-------------------------------------|-------------------------------------|------------------------------------------------------------------------------------------|
| <i>Module 1 - Sample</i>                           |                                     |                                     |                                     |                                                                                          |
| <b>Module 1A - Donor</b>                           |                                     |                                     |                                     |                                                                                          |
| 1.1                                                | <input checked="" type="checkbox"/> | <input type="checkbox"/>            | <input type="checkbox"/>            | Essential donor info                                                                     |
| <b>Module 1B Source</b>                            |                                     |                                     |                                     |                                                                                          |
| 1.2                                                | <input checked="" type="checkbox"/> | <input type="checkbox"/>            | <input type="checkbox"/>            | Source of cell material                                                                  |
| 1.3                                                | <input checked="" type="checkbox"/> | <input type="checkbox"/>            | <input type="checkbox"/>            | Collection methodology                                                                   |
| 1.4                                                | <input type="checkbox"/>            | <input type="checkbox"/>            | <input checked="" type="checkbox"/> | anti-coagulant, if available                                                             |
| 1.5                                                | <input type="checkbox"/>            | <input type="checkbox"/>            | <input checked="" type="checkbox"/> | Transportation/storage conditions for unprocessed samples, if available                  |
| 1.6                                                | <input checked="" type="checkbox"/> | <input type="checkbox"/>            | <input type="checkbox"/>            | Cell processing methodology                                                              |
| 1.7                                                | <input type="checkbox"/>            | <input type="checkbox"/>            | <input checked="" type="checkbox"/> | Median time and ranges from sample collection until end of cell processing, if available |
| 1.8                                                | <input type="checkbox"/>            | <input type="checkbox"/>            | <input type="checkbox"/>            | Cut-offs, if used                                                                        |
| <b>Module 1C - Cryopreservation and Storage</b>    |                                     |                                     |                                     |                                                                                          |
| 1.9                                                | <input checked="" type="checkbox"/> | <input type="checkbox"/>            | <input type="checkbox"/>            | Fresh or cryopreserved                                                                   |
|                                                    |                                     |                                     |                                     | If cryopreserved                                                                         |
| 1.10                                               | <input checked="" type="checkbox"/> | <input type="checkbox"/>            | <input type="checkbox"/>            | devices used                                                                             |
| 1.11                                               | <input checked="" type="checkbox"/> | <input type="checkbox"/>            | <input type="checkbox"/>            | freezing process                                                                         |
| 1.12                                               | <input checked="" type="checkbox"/> | <input type="checkbox"/>            | <input type="checkbox"/>            | medium used for freezing                                                                 |
| 1.13                                               | <input type="checkbox"/>            | <input type="checkbox"/>            | <input type="checkbox"/>            | Median time and temperature for each transportation and storage step, if available       |
| 1.14                                               | <input type="checkbox"/>            | <input type="checkbox"/>            | <input type="checkbox"/>            | Cut-offs, if used                                                                        |
| <b>Module 1D - Cell Counting</b>                   |                                     |                                     |                                     |                                                                                          |
| 1.15                                               | <input checked="" type="checkbox"/> | <input type="checkbox"/>            | <input type="checkbox"/>            | Median cell yield and viability (where available)                                        |
| 1.16                                               | <input type="checkbox"/>            | <input type="checkbox"/>            | <input type="checkbox"/>            | before freezing                                                                          |
| 1.17                                               | <input type="checkbox"/>            | <input type="checkbox"/>            | <input type="checkbox"/>            | after thawing                                                                            |
| 1.18                                               | <input type="checkbox"/>            | <input type="checkbox"/>            | <input type="checkbox"/>            | after overnight resting                                                                  |
| 1.19                                               | <input type="checkbox"/>            | <input type="checkbox"/>            | <input type="checkbox"/>            | Cut-offs, if used                                                                        |
| 1.20                                               | <input checked="" type="checkbox"/> | <input type="checkbox"/>            | <input type="checkbox"/>            | Cell counting methodology                                                                |
| 1.21                                               | <input type="checkbox"/>            | <input type="checkbox"/>            | <input checked="" type="checkbox"/> | <i>Optional: Additional assessments</i>                                                  |
| <i>Module 2 - Assay</i>                            |                                     |                                     |                                     |                                                                                          |
| <b>Module 2A - Medium/serum</b>                    |                                     |                                     |                                     |                                                                                          |
| 2.1                                                | <input checked="" type="checkbox"/> | <input type="checkbox"/>            | <input type="checkbox"/>            | Medium/(serum) details                                                                   |
| 2.2                                                | <input checked="" type="checkbox"/> | <input type="checkbox"/>            | <input type="checkbox"/>            | Pretesting info                                                                          |
| <b>Module 2B - Assay</b>                           |                                     |                                     |                                     |                                                                                          |
| 2.3                                                | <input type="checkbox"/>            | <input type="checkbox"/>            | <input checked="" type="checkbox"/> | Treatment procedures of cells prior to assay, if applicable                              |
| 2.4                                                | <input checked="" type="checkbox"/> | <input type="checkbox"/>            | <input type="checkbox"/>            | Sufficient assay details                                                                 |
| <b>Module 2C - Controls</b>                        |                                     |                                     |                                     |                                                                                          |
| 2.5                                                | <input checked="" type="checkbox"/> | <input type="checkbox"/>            | <input type="checkbox"/>            | Internal assay controls                                                                  |
| 2.6                                                | <input type="checkbox"/>            | <input type="checkbox"/>            | <input type="checkbox"/>            | Acceptance criteria, if available                                                        |
| 2.7                                                | <input type="checkbox"/>            | <input type="checkbox"/>            | <input type="checkbox"/>            | External reference samples, if used                                                      |
| 2.8                                                | <input type="checkbox"/>            | <input type="checkbox"/>            | <input type="checkbox"/>            | Assay acceptance criteria, if available                                                  |
| <i>Module 3 - Data Acquisition</i>                 |                                     |                                     |                                     |                                                                                          |
| <b>Module 3A - Equipment and software</b>          |                                     |                                     |                                     |                                                                                          |
| 3.1                                                | <input checked="" type="checkbox"/> | <input type="checkbox"/>            | <input type="checkbox"/>            | Equipment and software version                                                           |
| 3.2                                                | <input type="checkbox"/>            | <input type="checkbox"/>            | <input type="checkbox"/>            | Basic equipment settings, if available                                                   |
| <b>Module 3B - Acquisition Strategy and Gating</b> |                                     |                                     |                                     |                                                                                          |
| 3.3                                                | <input checked="" type="checkbox"/> | <input type="checkbox"/>            | <input type="checkbox"/>            | Detailed gating strategy or strategy for establishing spot detection parameters          |
| 3.4                                                | <input checked="" type="checkbox"/> | <input type="checkbox"/>            | <input type="checkbox"/>            | Representative data set                                                                  |
| 3.5                                                | <input type="checkbox"/>            | <input type="checkbox"/>            | <input type="checkbox"/>            | Mean, median, ranges of event counts for relevant populations, if available              |
| 3.6                                                | <input type="checkbox"/>            | <input type="checkbox"/>            | <input type="checkbox"/>            | <i>Optional: Unusual strategies explained</i>                                            |
| 3.7                                                | <input type="checkbox"/>            | <input type="checkbox"/>            | <input checked="" type="checkbox"/> | <i>Optional: Review of raw data</i>                                                      |
| <i>Module 4 - Results</i>                          |                                     |                                     |                                     |                                                                                          |
| <b>Module 4A - Raw data</b>                        |                                     |                                     |                                     |                                                                                          |
| 4.1                                                | <input type="checkbox"/>            | <input type="checkbox"/>            | <input type="checkbox"/>            | Background and ag-specific reactivity levels, if available                               |
| 4.2                                                | <input type="checkbox"/>            | <input type="checkbox"/>            | <input type="checkbox"/>            | Cut-off specifications and # of tests OOS, if available                                  |
| 4.3                                                | <input checked="" type="checkbox"/> | <input type="checkbox"/>            | <input type="checkbox"/>            | Accessibility of raw data addressed?                                                     |
| <b>Module 4B - Response determination</b>          |                                     |                                     |                                     |                                                                                          |
| 4.4                                                | <input checked="" type="checkbox"/> | <input type="checkbox"/>            | <input type="checkbox"/>            | Definition of positive reactivity (above background) including tests applied             |
| 4.5                                                | <input type="checkbox"/>            | <input type="checkbox"/>            | <input checked="" type="checkbox"/> | Parameters, software and version used for response determination, if applicable          |
| 4.6                                                | <input checked="" type="checkbox"/> | <input type="checkbox"/>            | <input type="checkbox"/>            | Response definition predefined or post-hoc?                                              |
| 4.7                                                | <input type="checkbox"/>            | <input type="checkbox"/>            | <input type="checkbox"/>            | Definition of response induced by treatment, if applicable                               |
| 4.8                                                | <input type="checkbox"/>            | <input type="checkbox"/>            | <input type="checkbox"/>            | Any data excluded and why, if applicable?                                                |
| 4.9                                                | <input type="checkbox"/>            | <input type="checkbox"/>            | <input type="checkbox"/>            | <i>Optional: Why test was used</i>                                                       |
| <i>Module 5</i>                                    |                                     |                                     |                                     |                                                                                          |
| <b>Module 5A - General Lab Operation</b>           |                                     |                                     |                                     |                                                                                          |
| 5.1                                                | <input checked="" type="checkbox"/> | <input type="checkbox"/>            | <input type="checkbox"/>            | Guidance of lab operations                                                               |
| 5.2                                                | <input type="checkbox"/>            | <input checked="" type="checkbox"/> | <input type="checkbox"/>            | Laboratory accreditations and certifications, if available                               |
| 5.3                                                | <input type="checkbox"/>            | <input type="checkbox"/>            | <input type="checkbox"/>            | <i>Optional: Details on audits</i>                                                       |
| <b>Module 5B - Standardization</b>                 |                                     |                                     |                                     |                                                                                          |
| 5.4                                                | <input checked="" type="checkbox"/> | <input type="checkbox"/>            | <input type="checkbox"/>            | Status of protocols                                                                      |
| <b>Module 5C - Qualification/Validation</b>        |                                     |                                     |                                     |                                                                                          |
| 5.5                                                | <input checked="" type="checkbox"/> | <input type="checkbox"/>            | <input type="checkbox"/>            | Status of assays                                                                         |
| 5.6                                                | <input type="checkbox"/>            | <input type="checkbox"/>            | <input type="checkbox"/>            | <i>Optional: Specific performance criteria</i>                                           |

## Gating to determine WT1 expression in DCs

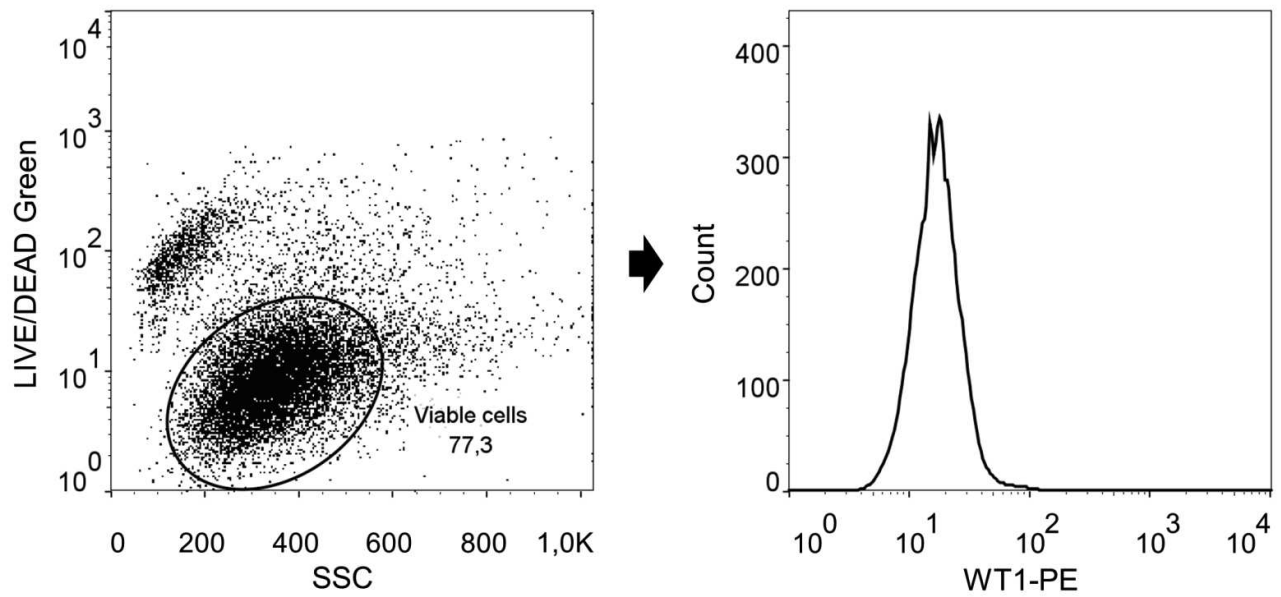

**Suppl. Fig. 1 WT1 expression gating strategy** Viable DCs were selected based on LIVE/DEAD® Fixable Green staining prior to calculating the mean fluorescent intensity (geometric mean) in the PE channel. One representative data set is shown. SSC, side scatter

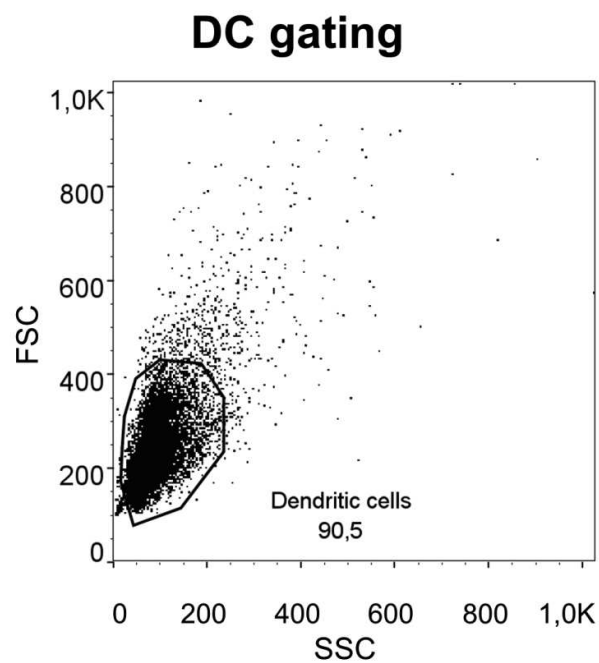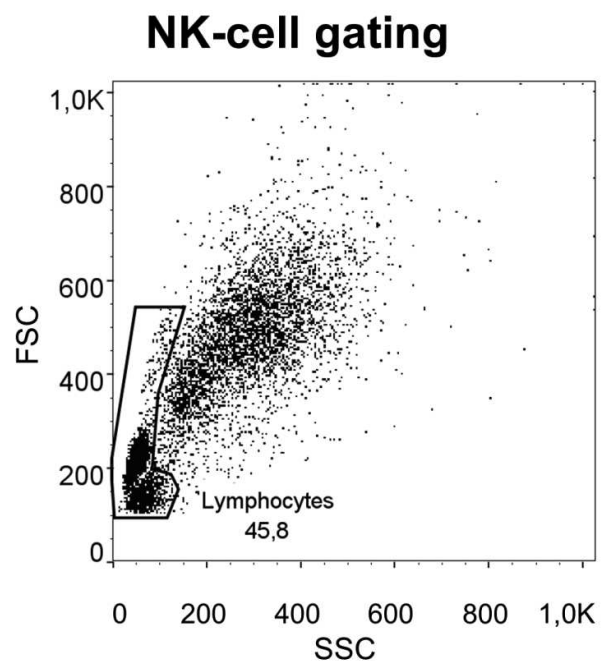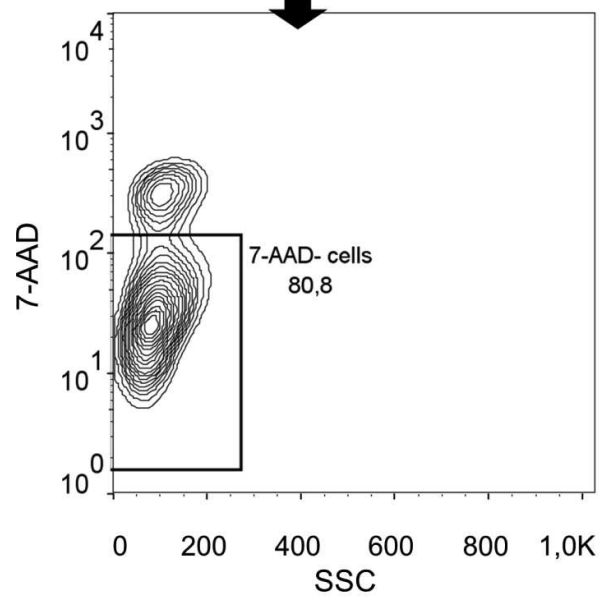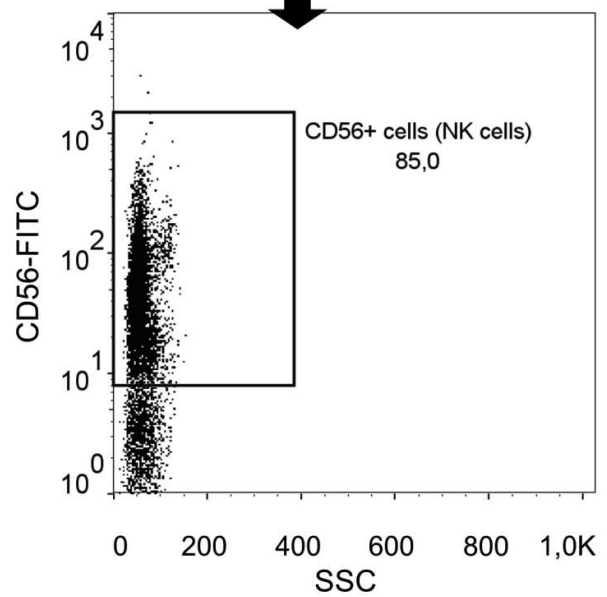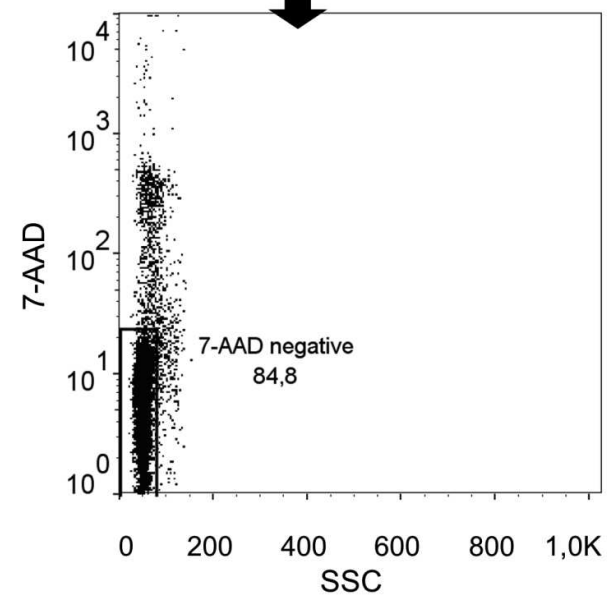

**Suppl. Fig. 2 Immunophenotyping gating strategy** DCs (left panel) and NK cells (right panel) were first gated on side scatter/forward scatter properties. NK cells were further selected based on CD56 expression. The proportion of viable DCs and NK cells was determined based on 7-AAD staining. One representative data set is shown for either DCs or NK cells. FSC, forward scatter; SSC, side scatter.

## T-cell gating (MLR)

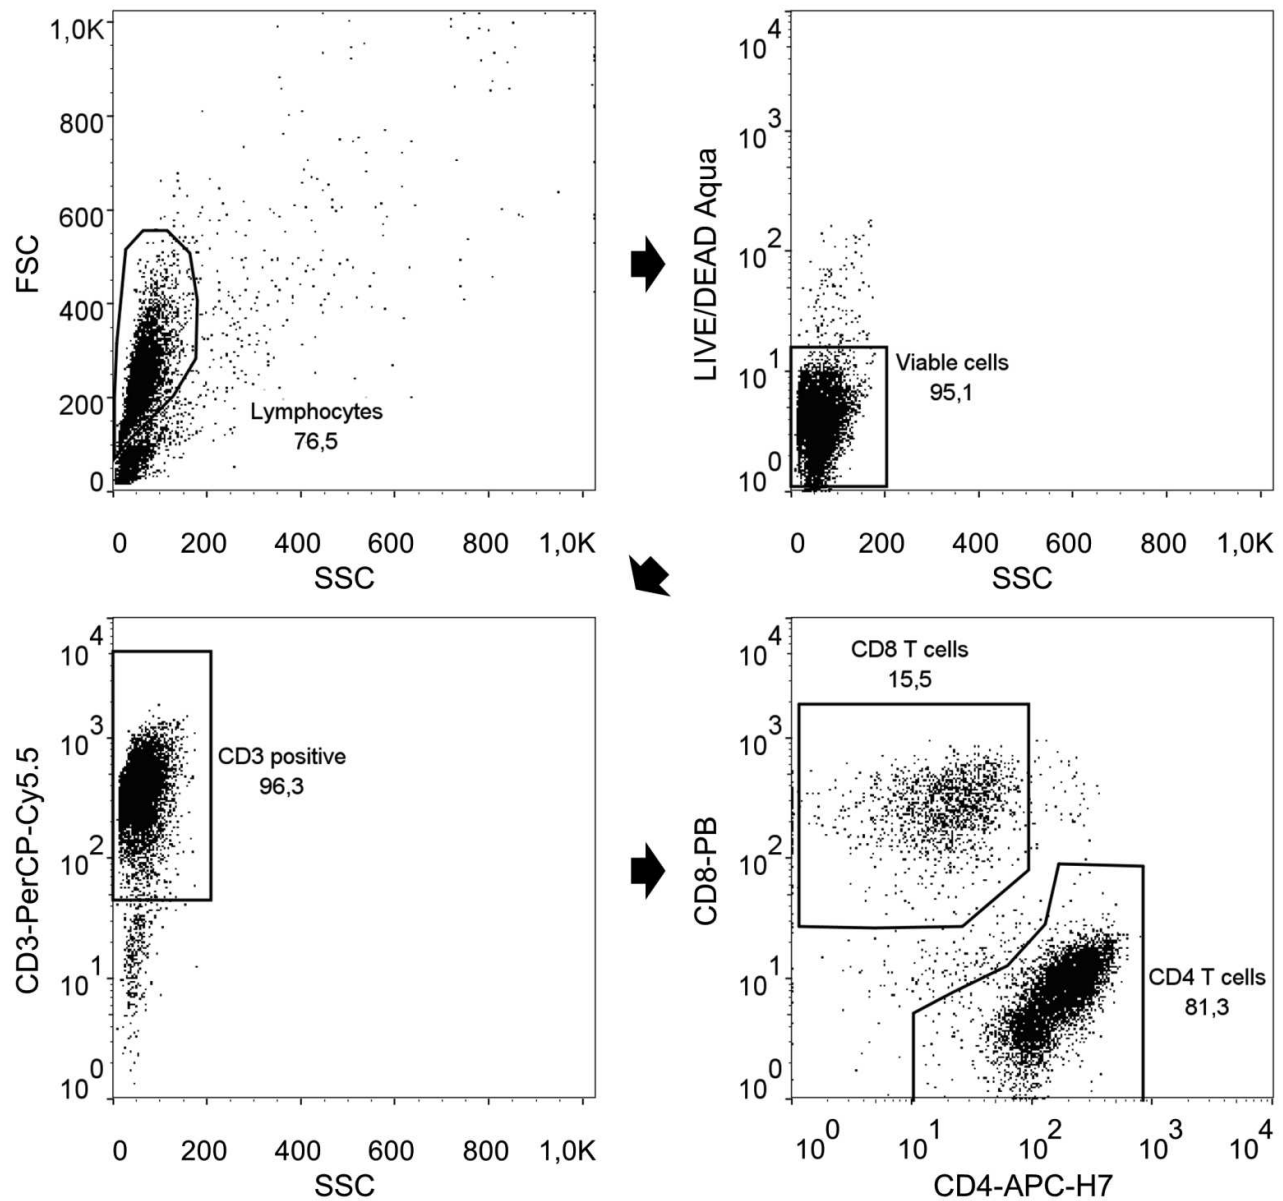

**Suppl. Fig. 3 MLR gating strategy** Lymphocytes were first gated on side scatter/forward scatter properties. Dead cells were further excluded based on LIVE/DEAD® Fixable Aqua staining. CD3<sup>+</sup> cells were selected and subdivided into CD4<sup>+</sup> and CD8<sup>+</sup> cells. One representative data set is shown. FSC, forward scatter; SSC, side scatter.

## Viable tumor-cell gating (NK-cell cytotoxicity assay)

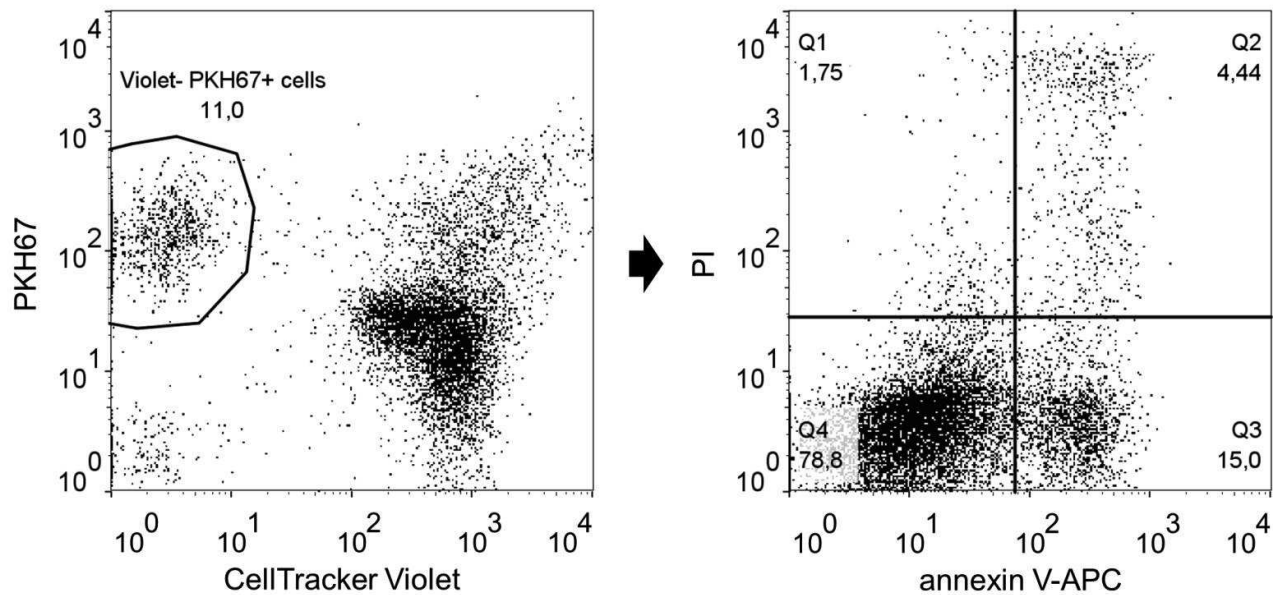

**Suppl. Fig. 4 NK-cell cytotoxicity assay gating strategy** PKH67-labeled tumor cells were differentiated from CellTracker Violet-labeled DCs and unlabeled NK cells. Viability of Violet/PKH67<sup>+</sup> tumor cells was determined based on annexin V and PI staining. One representative data set containing tumor cells, DCs and NK cells is shown.
